# Supplementary material
Source: publisher site journal article supplement (https://www.dovepress.com/get_supplementary_file.php?f=380891.docx)
Supplement: Supplementary file 1 [file get_supplementary_file.php]

**Appendix A: Survey**

Survey Questions*

**Survey print-out from Qualtrics platform. Question numbers do not necessarily represent the amount of questions included but are assigned by Qualtrics to direct built-in logic.*

**Definitions:**
This survey refers to the following terms as follows. Definitions will be repeated on relevant pages of the survey as a reminder.
**“Program”** or **“medical program”** refers to a medical degree program with structured curriculum leading to MD or DO

**“Institution”** refers to a college or university that encompasses medical program and other academic schools/departments for undergraduate or graduate education

**“International rotation”** refers to elective, non-elective, or required experiences in which a U.S.-based medical student travels to a different country (non-U.S.) to meet educational objectives as part of the medical program

**“Domestic community-based learning rotation”** refers to elective, non-elective, or required experiences in which medical students meet educational objectives in a community setting (non-classroom setting) in the United States

| Page Break |  |
| --- | --- |

The following questions relate to key characteristics of your medical program.

About how many students **per year** does your medical program have? (Medical program refers to degree program with structured curriculum leading to MD or DO)

- Less than 100 (1)
- 100-199 (2)
- 200-299 (3)
- 300-399 (4)
- 400-499 (5)
- 500 or more (6)

Please select from the following characteristics about your medical program - choose all that apply:

- Public (1)
- Private (2)
- Research university (3)
- Faith-affiliated (4)
- Urban (5)
- Rural (6)
- Suburban (7)
- MD-granting (8)
- DO-granting (9)

“International rotation” refers to elective, non-elective, or required experiences in which a U.S.-based medical student travels to a different country (non-U.S.) to meet educational objectives as part of the medical program.

Does your medical program offer international rotations?

- Yes (1)
- No (2)
- Unsure/Don't know (4)

Skip To: Q40 If “International rotation” refers to elective, non-elective, or required experiences in which a U.S... = No

Skip To: Q40 If “International rotation” refers to elective, non-elective, or required experiences in which a U.S... = Unsure/Don't know

Display This Question:

If “International rotation” refers to elective, non-elective, or required experiences in which a U.S... = Yes

Which of the following components are part of the international rotations? Please choose all that apply:

- Activities tied to course learning objectives (1)
- Non-clinical service projects (2)
- Observation of medical procedures (3)
- Pre-departure orientation (4)
- Post-travel debrief (5)
- Student reflection while at international site (6)
- Student reflection of the activity upon return to home program (7)
- Preceptor or mentor from home program (8)
- Preceptor or mentor from international site (9)
- Clinical service (medical treatment given by student to patient) (10)
- Student engagement in research (11)

Taking into account all of the international rotation experiences within your medical program, what do you consider to be the average duration?

- Less than 1 month (1)
- 1-3 months (2)
- 4-6 months (3)
- Longer than 6 months (4)
- Unsure/Don't know (5)

On average, about how many international rotations might a student take over the course of the entire medical program?

- 0 (1)
- 1 (2)
- 2 (3)
- 3 (4)
- 4 (5)
- 5 (6)
- More than 5 (7)

Taking into account all of the international rotation experiences within your medical program, in which countries do *most* international rotations occur?

- Low-income countries (1)
- Middle-income countries (5)
- High-income countries (6)
- Unsure/Don't know (7)

| Page Break |  |
| --- | --- |

Do the majority of students take international rotations as:

- An elective component of the medical program (1)
- A required component of the medical program (2)
- Both a required component and elective components of the medical program (3)

Display This Question:

If Do the majority of students take international rotations as: = An elective component of the medical program

Do the majority of students take international rotations as electives in:

- The first two years of the medical program (1)
- The last two years of the medical program (2)
- Unsure/Don't know (3)

Display This Question:

If Do the majority of students take international rotations as: = A required component of the medical program

Do the majority of students take international rotations as required components in:

- The first two years of the medical program (1)
- The last two years of the medical program (2)
- Unsure/Don't know (3)

Display This Question:

If Do the majority of students take international rotations as: = Both a required component and elective components of the medical program

How do the majority of students typically take international rotations during the medical program?

|  | The first two years of the medical program (1) | The second two years of the medical program (2) | Unsure/Don't know (3) |
| --- | --- | --- | --- |
| As a REQUIREMENT during which years: (1) |  |  |  |
| As an ELECTIVE during which years? (2) |  |  |  |

Are there additional course fees for international rotations, including travel, beyond regular tuition payment?

- Yes (1)
- No (2)
- Unsure/Don't know (4)

Display This Question:

If Are there additional course fees for international rotations, including travel, beyond regular tu... = Yes

In your medical program, the additional course fees for international rotations are *most commonly* paid by which of the following:

- The student (1)
- The medical program or institution (2)
- Scholarships for students (3)
- Grants for students (4)

| Page Break |  |
| --- | --- |

Please select the frequency at which the following occur in your medical program:

|  | Never (7) | Sometimes (8) | About half the time (9) | Most of the time (10) | Always (11) |
| --- | --- | --- | --- | --- | --- |
| Students receive academic credit for their international rotations (1) |  |  |  |  |  |
| Students' international rotation performance is evaluated by members of the home/sending program (2) |  |  |  |  |  |
| Students' international rotation performance is evaluated by members of the host/receiving program or site (3) |  |  |  |  |  |
| Students are precepted or supervised during international rotations by someone from their home/sending program (4) |  |  |  |  |  |
| Students are precepted or supervised during international rotations by someone from the host/receiving program or site (5) |  |  |  |  |  |
| International rotations require a pre-departure orientation (6) |  |  |  |  |  |
| International rotations require a post-travel debrief (7) |  |  |  |  |  |

Does your medical program partner with any of the following types of other entities to design, plan, or implement international rotations? Please check all that apply.

- None, all completed at medical program (1)
- Host/receiving institution or site (7)
- Non-governmental organizations (NGOs), including non-profits (2)
- International NGOs (3)
- Private companies (4)
- For-profit companies (5)
- Faith-based organizations (6)

| Page Break |  |
| --- | --- |

Please select your level of agreement with the following statements related to implementing the international rotation:

|  | Strongly agree (11) | Somewhat agree (12) | Neither agree nor disagree (13) | Somewhat disagree (14) | Strongly disagree (15) |
| --- | --- | --- | --- | --- | --- |
| The GOALS of the international rotation host site are considered (1) |  |  |  |  |  |
| The NEEDS of the international rotation host site are considered (2) |  |  |  |  |  |
| The TIMELINES of the international rotation host site are considered (3) |  |  |  |  |  |
| The RESOURCES of the international rotation host site are considered (4) |  |  |  |  |  |
| The CAPACITY of the international rotation host site is considered (5) |  |  |  |  |  |
| Faculty or staff from international rotation host sites are involved in designing the international rotation (6) |  |  |  |  |  |

Does your medical program host students from other countries?

- Yes (1)
- No (4)
- Unsure/Don't know (5)

Skip To: Q36 If Does your medical program host students from other countries? = No

Skip To: Q36 If Does your medical program host students from other countries? = Unsure/Don't know

Display This Question:

If Does your medical program host students from other countries? = Yes

If your medical program hosts students from other countries, are the majority of these students from:

- Low-income countries (1)
- Middle-income countries (2)
- High-income countries (3)
- Unsure/Don't know (4)

**[Q36]** Does your medical program also offer domestic community-based education opportunities? (elective, non-elective, or required experiences in which medical students meet educational objectives in a community setting (non-classroom setting) in the United States)

- Yes (1)
- No (2)
- Unsure/Don't know (4)

Are international rotations a focus within your medical program's mission or purpose statement?

- Yes (1)
- No (2)
- Unsure/Don't know (3)

About how many years has your medical program included international rotations?

- Less than 1 year (1)
- 1-5 years (2)
- 6-10 years (3)
- More than 10 years (4)

Please list up to three other offices at your institution that are engaged in planning or implementing international rotations in collaboration with your medical program (study abroad office, community integration, etc.). If none, please leave blank.

________________________________________________________________

________________________________________________________________

________________________________________________________________

________________________________________________________________

________________________________________________________________

Skip To: Q41 If Please list up to three other offices at your institution that are engaged in planning or implementing... Is Displayed

**[Q40]** To the best of your knowledge, why doesn't your medical program offer international rotations?

________________________________________________________________

________________________________________________________________

________________________________________________________________

________________________________________________________________

________________________________________________________________

Skip To: Q43 If To the best of your knowledge, why doesn't your medical program offer international rotations? Is Displayed

**The following section explore barriers and facilitators of international rotations.**

Please select the level of influence these **barriers** have on your medical program engaging in international rotations:

|  | Not at all influential (1) | Slightly influential (2) | Very influential (3) | Extremely influential (4) |
| --- | --- | --- | --- | --- |
| Lack of grants or other funding (1) |  |  |  |  |
| Lack of convenient opportunities to develop community partnerships (2) |  |  |  |  |
| Insufficient rewards or roles for research with the community (3) |  |  |  |  |
| Unfamiliarity with leaders of community-based organizations/community agencies (4) |  |  |  |  |
| Encouragement of leadership (program, department, university) to perform research with the community (5) |  |  |  |  |
| Insufficient time for research with communities (7) |  |  |  |  |
| Competition of sites for community-based research or teaching (8) |  |  |  |  |
| Low student interest (9) |  |  |  |  |
| Ethical barriers (please specify) (11) |  |  |  |  |

Please select the level of influence these **facilitators** have on your medical program engaging in international rotations:

|  | Not at all influential (1) | Slightly influential (2) | Very influential (3) | Extremely influential (4) |
| --- | --- | --- | --- | --- |
| Access to grants or other funding (1) |  |  |  |  |
| Convenient opportunities to develop community partnerships (2) |  |  |  |  |
| Adequate rewards or roles for research with the community (3) |  |  |  |  |
| Familiarity with leaders of community-based organizations/community agencies (4) |  |  |  |  |
| Encouragement of leadership (program, department, university) to perform research with the community (5) |  |  |  |  |
| Adequate time for research with communities (7) |  |  |  |  |
| Availability of sites for community-based research or teaching (8) |  |  |  |  |
| High student interest (9) |  |  |  |  |

**[Q42]** Please list up to three facilitating structures that are in place to support implementation or advancement of international rotations (eg, administrative support, dedicated funding, etc.). If none, please leave blank.

________________________________________________________________

________________________________________________________________

| Page Break |  |
| --- | --- |

**The following section explores institutional factors related to international rotations at your medical program.**

"Institution" refers to a college or university that encompasses the medical program and other academic schools/departments for undergraduate or graduate education

Is your medical program situated within a larger higher education institution or university?

- Yes (1)
- No (2)

Skip To: Q47 If "Institution" refers to a college or university that encompasses the medical program and other ac... = No

Display This Question:

If "Institution" refers to a college or university that encompasses the medical program and other ac... = Yes

About how many students does your **institution** (college or university that encompasses medical program and other academic schools/departments for undergraduate or graduate education) have **per year**?

- Less than 500 (1)
- 500-2,999 (2)
- 3,000-5,999 (4)
- 6,000-8,999 (5)
- 9,000-11,199 (6)
- 12,000-14,999 (7)
- 15,000 or more (8)

Please select from the following characteristics about your **institution** - choose all that apply:

- Public (1)
- Private (2)
- Research university (3)
- Faith-affiliated (4)
- Urban (5)
- Rural (6)
- Suburban (7)

Does your **institution** have Carnegie Community Engagement classification?

- Yes (1)
- No (2)
- Unsure/Don't know (3)

| Page Break |  |
| --- | --- |

**[Q47]** Does your medical program also engage in domestic community-based education opportunities? (elective, non-elective, or required experiences in which medical students meet educational objectives in a community setting (non-classroom setting) in the United States)

- Yes (1)
- No (2)

About how many years has your medical program engaged in community-based education opportunities?

- Less than 1 year (1)
- 1-5 years (2)
- 6-10 years (3)
- More than 10 years (4)

| Page Break |  |
| --- | --- |

**The final section will collect your demographic information.**

What is your role at the medical program?

- Faculty (1)
- Staff (2)

Display This Question:

If What is your role at the medical program? = Faculty

Which best describes your position?

- Adjunct/Affiliate Professor (1)
- Assistant Professor (2)
- Associate Professor (3)
- Full Professor (4)
- Other (please specify) (5) ____________________________________________

Display This Question:

If What is your role at the medical program? = Staff

What is your job title?____________________________________________________

What is your home department or academic unit?_______________________________

How many years have you been in the position indicated above?

|  | 0 | 5 | 10 | 15 | 20 | 25 | 30 | 35 | 40 | 45 | 50 |
| --- | --- | --- | --- | --- | --- | --- | --- | --- | --- | --- | --- |

| Please slide the bar to select the number of years () | 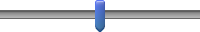 |
| --- | --- |

Do you have a joint appointment, job, or affiliation with another department or academic unit?

- Yes (please specify) (1)_____________________________________________
- No (2)

Do you belong to any professional associations related to planning or implementing international rotations?

- Yes (1)
- No (2)

Please select the ethnic background(s) you most identify with (choose all that apply):

- Caucasian/White (1)
- African American (2)
- American Indian/Alaska Native (3)
- Asian (4)
- Native Hawaiian/Other Pacific Islander (5)
- Hispanic/Latino (6)
- Other (please specify) (7) ___________________________________________

| Page Break |  |
| --- | --- |

The second stage of this research project includes follow-up interviews. Please enter your email address below if you are willing to be contacted for a 30-60 minute phone or video interview. Your email address will not be included with survey responses.

Yes, I am willing to be contacted for a follow up interview (please enter email address):

________________________________________________________________

If there are any other institutional stakeholders that you believe should be contacted for a follow-up interview, please list their contact information below. The name and email address will not be included with survey responses.

Name:________________________________________________________________

Email address:________________________________________________________________

Please briefly describe why you believe they should be contacted for a follow-up interview:______________________________________________________________

| Page Break |  |
| --- | --- |

Thank you for your time in completing this survey. Please enter your email address below if you would like a copy of the study results.

Email address: ________________________________________________________________

End of Block: Default Question Block

**Appendix B: Interview Protocol**

**Introduction:** The following questions explore international rotations in medical education. This portion of the study is voluntary, and the interviewee may stop the interview at any time. Responses will be recorded and any identifying information will be removed before the data is analyzed.

Semi-structured questions for follow-up interviews. Other questions may be designed based on individual survey responses. For the interview, some or all questions may be selected from the following:

**Key questions:**

1. Describe common international rotations at your medical program.
   1. What are some of the products or activities that students produce for successful completion of the rotation (project, paper, presentation, etc.)
   2. What types of activities are included in international rotations? Clinical? Non-clinical?
2. Please list up to three steps that are taken to identify suitable sites for international rotations.
3. Please list up to three steps that are taken to match students to sites for international rotations.
4. Why does your medical program engage in international rotations?
5. What do you perceive as benefits of international rotations at your medical program?
6. What do you perceive as disadvantages of international rotations at your medical program?
7. Do you expect growth of international rotations in the medical school in the future?
8. In what way has the medical school program changed since incorporating international rotations?
9. Is there anything else you would like to add?

**Secondary questions (if time allows):**

1. If your medical program partners with other organizations to plan or implement international rotations (indicated on survey response): Why does your program partner with these types of organizations?
2. Why do you, as an individual, engage in international rotations? What are the main challenges you face? What would make it easier?
3. Does the medical program include pre-departure orientation before the international rotations? What types of activities are included?
4. Does the medical program include a post-travel debrief after the international rotations? What types of activities are included?
5. If the medical program host students from other countries as well (indicated in the survey response): why does your program host students from other countries? In what components of the program do they engage?
6. If students are evaluated on the international rotation (indicated in the survey response): how are students evaluated? Who evaluates them?
